# Supplementary material for: Hierarchical architecture composites of N-doped hollow polyhedra anchored on Ti3C2Tx nanosheets for advanced lithium-ion and sodium-ion capacitors
Source: Royal Society of Chemistry journal article supplement (doi:10.1039/d4ta02646b), 2024-01-01
Supplement: d4ta02646b1.pdf [file d4ta02646b1.pdf]

## **Supporting Information**

### **Hierarchical Architecture composite of N-doped Hollow Polyhedrons Anchored on $\text{Ti}_3\text{C}_2\text{T}_x$ Nanosheets for Advanced Lithium-Ion and Sodium-Ion Capacitors**

Wenling Wu\*, Jiahao Diwu, Jiang Guo, Yuan Fang, Lei Wang, Chenguang Li, Qing

Wu, Jianfeng Zhu

School of Material Science and Engineering, Shaanxi Key Laboratory of Green

Preparation and Functionalization for Inorganic Materials, Shaanxi University of

Science and Technology, Xi'an, 710021, PR China

---

\*Corresponding author, E-mail address: wuwenling@sust.edu.cn<sub>2</sub>

## 1.1 Materials

Cobalt nitrate hexahydrate ( $\text{Co}(\text{NO}_3)_2 \cdot 6\text{H}_2\text{O}$ ,  $\geq 99.0\%$ ), zinc nitrate hexahydrate ( $\text{Zn}(\text{NO}_3)_2 \cdot 6\text{H}_2\text{O}$ ,  $\geq 99.0\%$ ), Dimethylimidazole ( $\text{C}_4\text{H}_6\text{N}_2$ ,  $\geq 99.8\%$ ), Hydrochloric acid ( $\text{HCl}$ , 12 M, 37 wt.%), Sulphuric acid ( $\text{H}_2\text{SO}_4$ , 95.0%~98%) and Methanol ( $\text{CH}_3\text{OH}$ ,  $\geq 99.8\%$ ) were purchased from Sinopharm Chemical Reagent. Titanium-aluminium carbon ( $\text{Ti}_3\text{AlC}_2$ ,  $\geq 99.9\%$ ) was purchased from Yiyi Science and Technology, Jilin Province, and Lithium fluoride ( $\text{LiF}$ ,  $\geq 98.0\%$ ) was purchased from Shanghai Aladdin. The materials and reagents used in this work can be used without secondary purification and are of analytical grade.

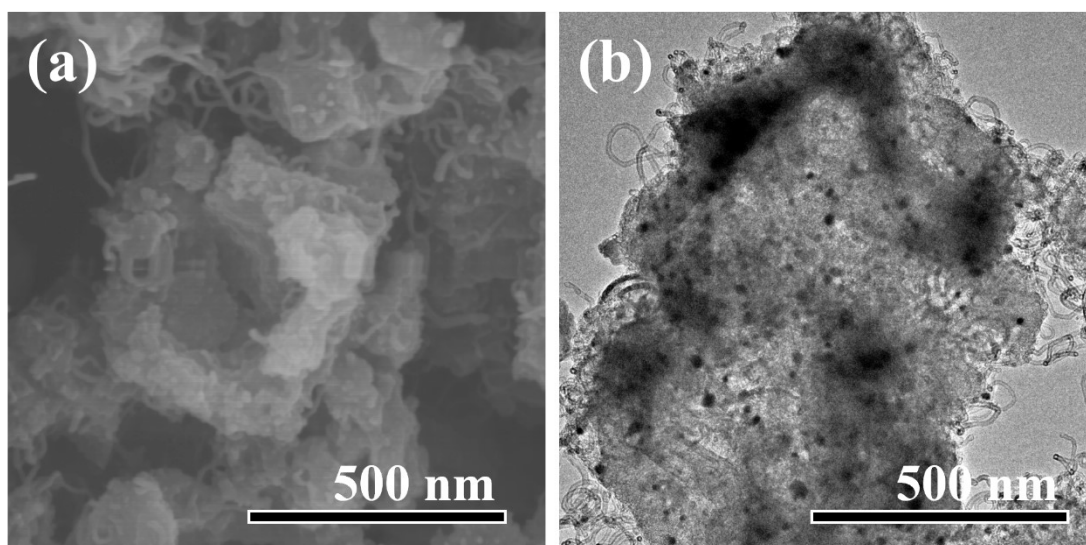

**Fig. S1** Destroyed Co@NC images, (a) SEM, (b) TEM

As can be seen from the figure, without the protection of the outermost Zn atoms, the hollow polyhedral structure is damaged by the haphazardly growing CNTs and the shell ruptures.

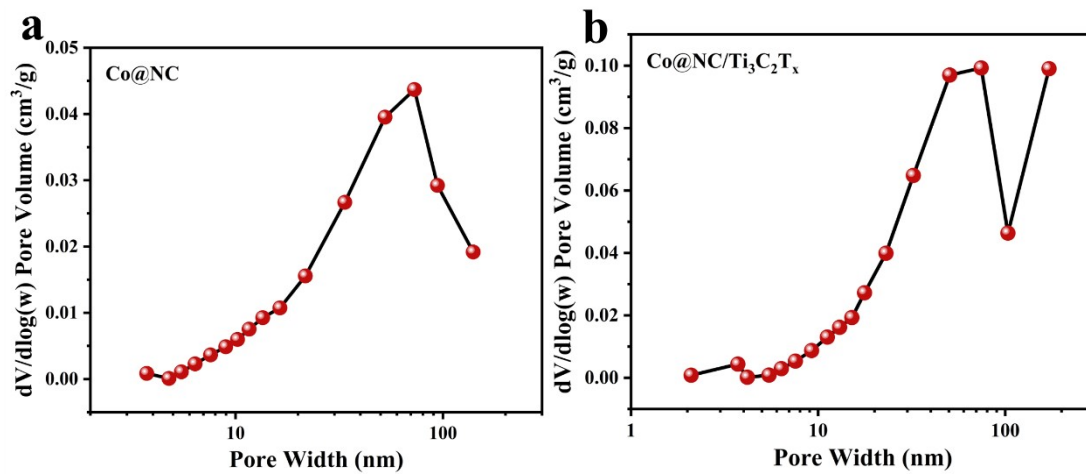

Fig. S2 Aperture distribution of Co@NC and Co@NC/Ti<sub>3</sub>C<sub>2</sub>T<sub>x</sub>

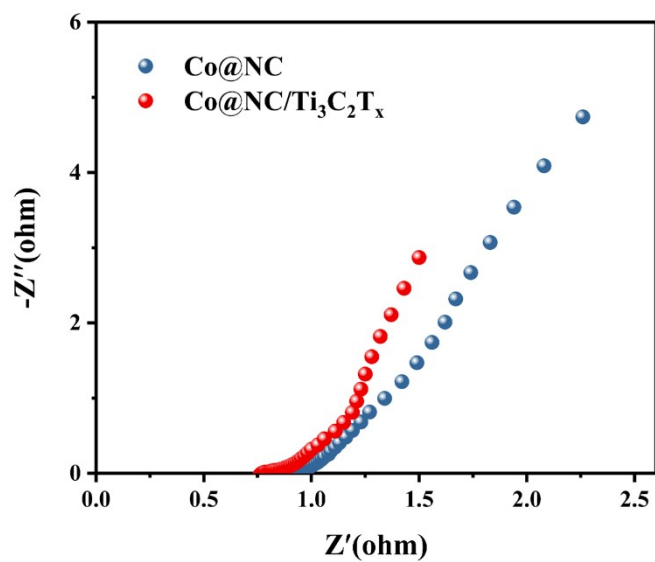

Fig. S3 Co@NC and Co@NC/Ti<sub>3</sub>C<sub>2</sub>T<sub>x</sub> electrode materials Amplified EIS curve for the high frequency region

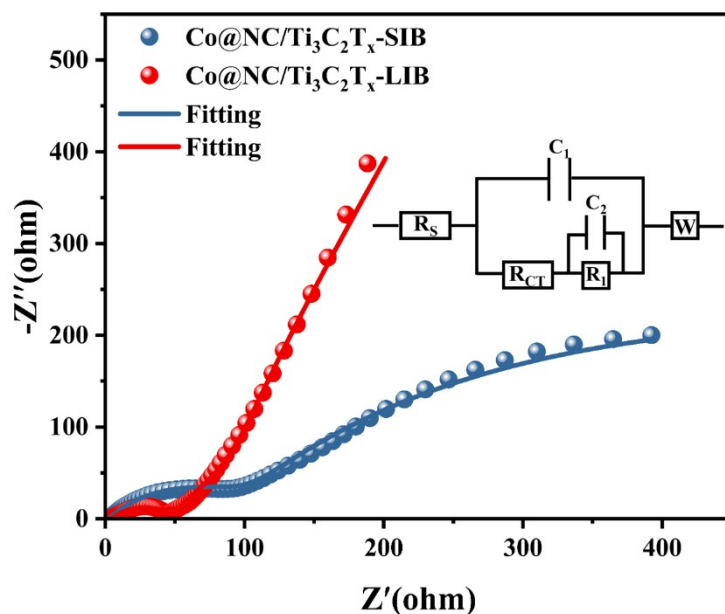

**Fig. S4** EIS plots of LIB and SIB of Co@NC/Ti<sub>3</sub>C<sub>2</sub>T<sub>x</sub> electrode materials

In Fig. S4, the 45 degrees in the low-frequency region of the EIS curves of Co@NC/Ti<sub>3</sub>C<sub>2</sub>T<sub>x</sub> LIB and SIB indicate the battery-like characteristics of the materials. The specific fitted values are shown in Table S1.

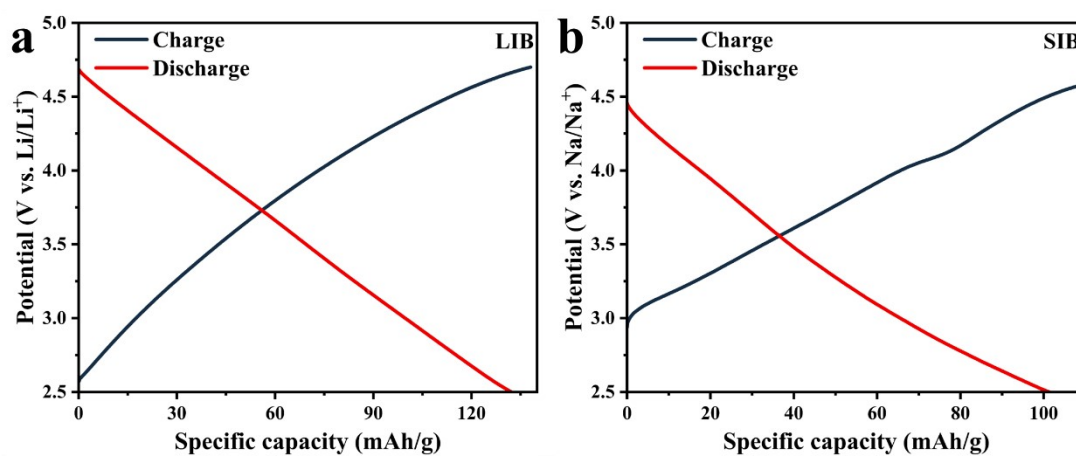

**Fig. S5** Specific capacity plots of AC electrode materials in LIB and SIB

In Fig. S5, the discharge specific capacity values are 132 mAh/g for LIB(AC) and 101 mAh/g for SIB(AC).

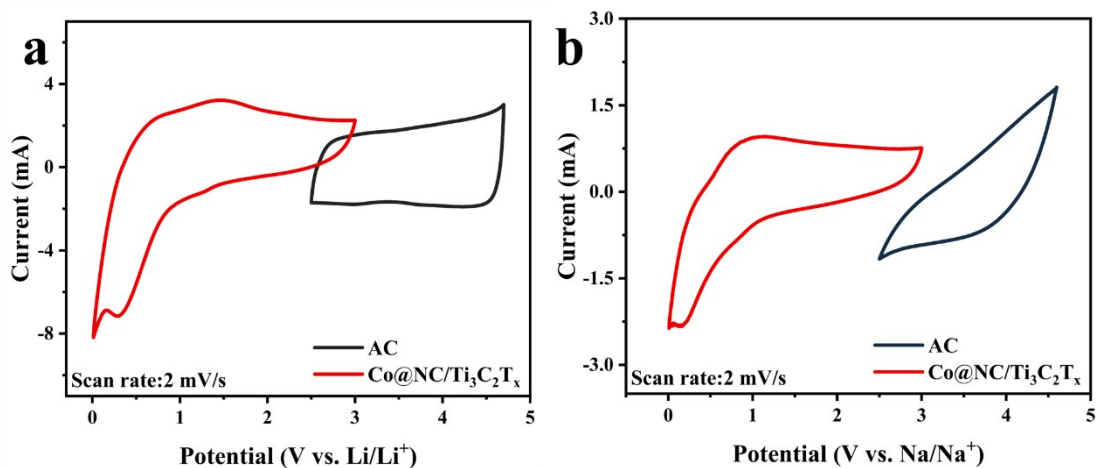

**Fig. S6** CV matching plot for Co@NC/Ti<sub>3</sub>C<sub>2</sub>T<sub>x</sub>//AC LIHC and SIHC devices

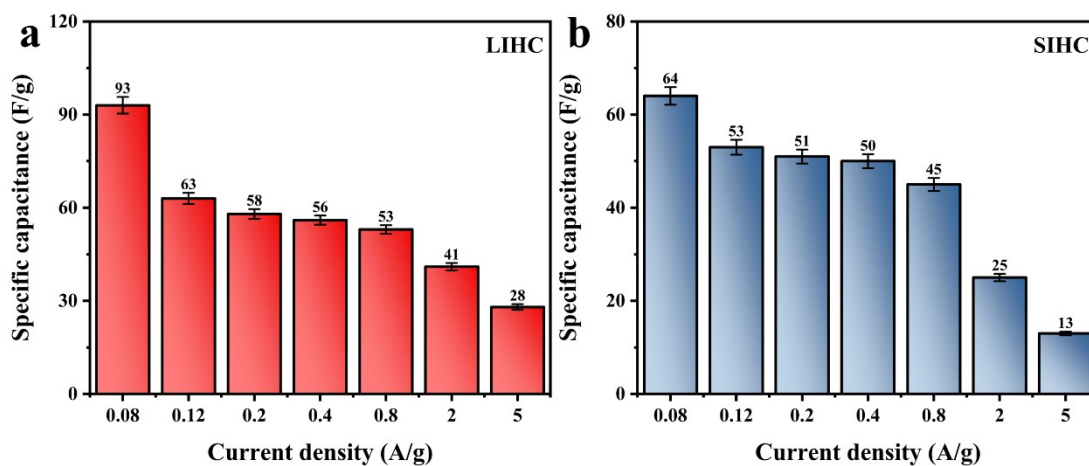

**Fig. S7** Specific capacitance value plots for Co@NC/Ti<sub>3</sub>C<sub>2</sub>T<sub>x</sub>//AC LIHC and SIHC devices

Fig. S7 shows the specific capacitance values of the Co@NC/Ti<sub>3</sub>C<sub>2</sub>T<sub>x</sub>//AC devices. Specifically, the specific capacitance values in the LIHC at current densities of 0.08, 0.12, 0.2, 0.4, 0.8, 2, and 5 A/g have 93, 63, 58, 56, 53, 41, and 28 F/g. The corresponding specific capacitance values for the SIHC are 64, 53, 51, 50, 45, 25, and 13 F/g.

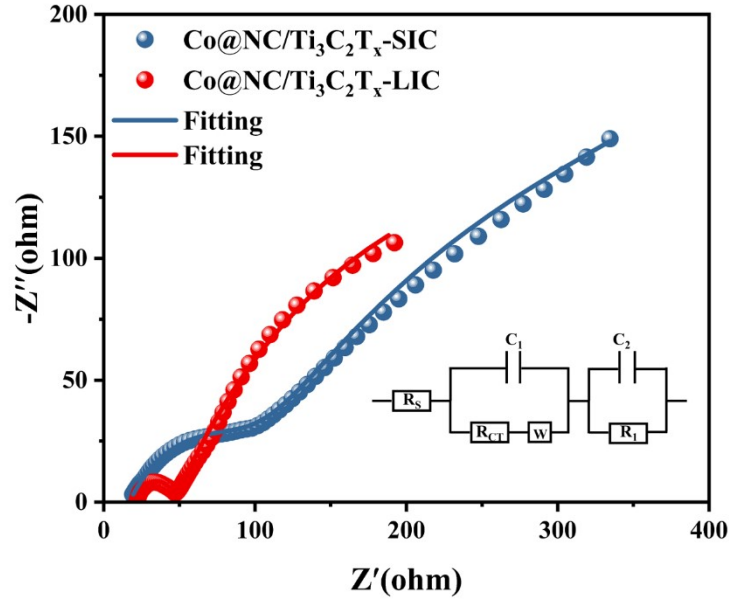

**Fig. S8** EIS diagrams for Co@NC/Ti<sub>3</sub>C<sub>2</sub>T<sub>x</sub>//AC LIHC and SIHC devices

In Fig. S8, the 45 degrees in the low frequency region of the EIS curves for Co@NC/Ti<sub>3</sub>C<sub>2</sub>T<sub>x</sub>//AC LIHC and SIHC indicate the battery-like characteristics of the materials. The fitted values are shown in Table S1.

**Table S1.** EIS data. (Three repeated experiments were conducted.)

| Electrode materials                    | Co@NC/Ti <sub>3</sub> C <sub>2</sub> T <sub>x</sub> | Co@NC  | LIB    | SIB    | LIC    | SIC    |
|----------------------------------------|-----------------------------------------------------|--------|--------|--------|--------|--------|
| R <sub>s</sub> (ohm-cm <sup>2</sup> )  | 0.78                                                | 0.94   | 4.9    | 3.1    | 21.7   | 17.0   |
| R <sub>CT</sub> (ohm-cm <sup>2</sup> ) | 0.0073                                              | 0.01   | 45.6   | 122.1  | 25.0   | 91.4   |
| C1 (F/cm <sup>2</sup> )                | 0.020                                               | 0.045  | 2.3E-4 | 2.4E-4 | 3.8E-5 | 8.6E-5 |
| C2 (F/cm <sup>2</sup> )                | 0.39                                                | 0.22   | 0.012  | 8.5E-4 | 0.011  | 1.5E-3 |
| Warburg.Yo(S-sec <sup>0.5</sup> )      | 0.76                                                | 0.29   | 0.05   | 0.08   | 0.041  | 5.6E-3 |
| R <sub>1</sub> (ohm-cm <sup>2</sup> )  | 277                                                 | 425    | 283    | 723    | 290    | 288    |
| Error                                  | <1.21%                                              | <1.12% | <1.35% | <1.17% | <0.86% | <1.31% |

### Error estimates evaluation

The error estimates are a description of the experimental effectiveness of the corresponding data. Suppose we have done n repeated experiments and get the datas  $X_i$  ( $i = 1, 2, \dots, n$ ), and the error bars are calculated as follows:

$$a = \frac{1}{n} \sum_{i=1}^n X_i \quad (1)$$

$$error\ bar = \pm \sqrt{\frac{\sum_{i=1}^n (X_i - a)^2}{n - 1}} \quad (2)$$

### Electric charge matching:

According to the principle of charge balance, the mass ratio between the cathode and the anode is 5:1. The formula and details are shown below:

$$Q^+ = Q^- = It$$

$$\Delta E_- \cdot m_- \cdot C_{electrode-} = \Delta E_+ \cdot m_+ \cdot C_{electrode+}$$

Where,  $Q^+$ ,  $Q^-$  for the cathode and anode electrode charge (C),  $I$  is current (A),  $t$  for the time (s),  $\Delta E_+$ ,  $\Delta E_-$  for the positive and negative electrodes voltage window (V),  $m_+$ ,  $m_-$  for the positive and negative electrode active material loading (g),  $C_{electrode+}$  and  $C_{electrode-}$  for the positive and negative electrodes of the mass ratio of capacitance (mAh/g).
